# Supplementary material
Source: PubMed Central journal article supplement (PMC3303946)

Figure s

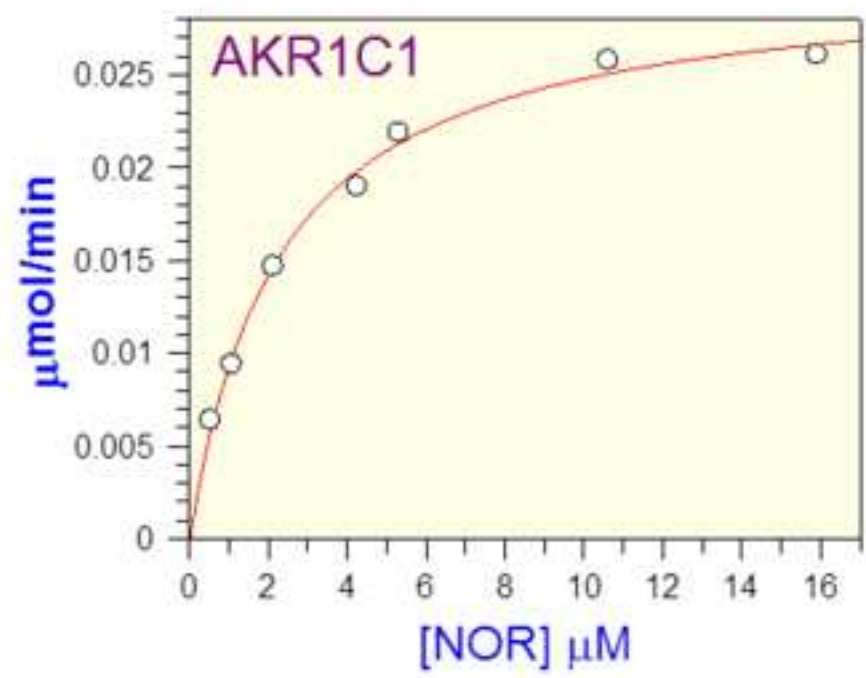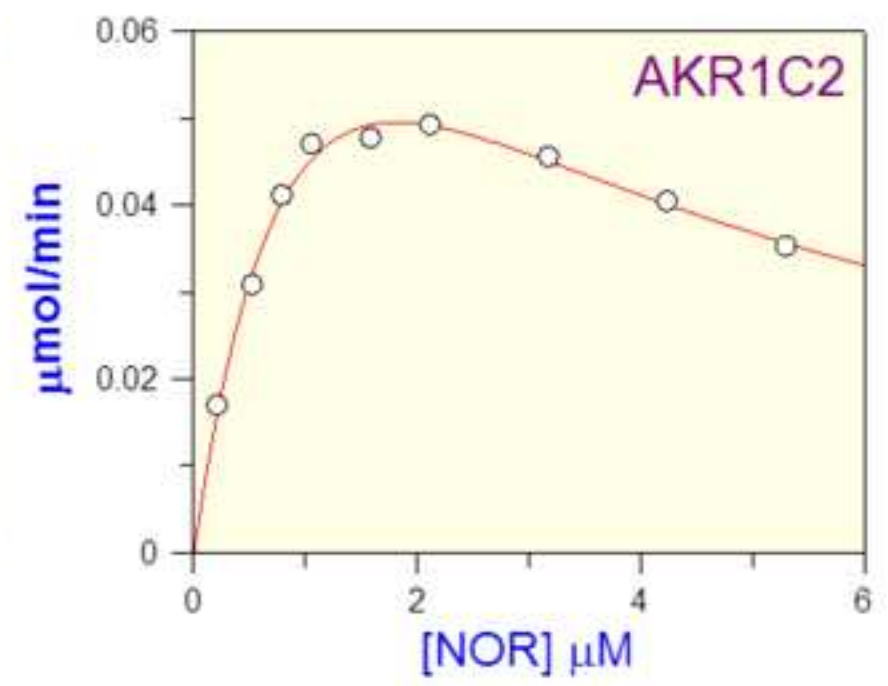

Supplement: NIHMS346773-supplement-01.pdf [file NIHMS346773-supplement-01.pdf]
